# Supplementary material
Source: Royal Society of Chemistry journal article supplement (doi:10.1039/d5ta09867j)
Supplement: d5ta09867j1.pdf [file d5ta09867j1.pdf]

**Supporting Information**

**Vacancy-rich  $\text{Ti}_3\text{C}_2\text{O}_x$  (MXene)-anchored Co nanocluster catalyst  
enhances the selective hydrogenation of cinnamaldehyde**

Haixiang Shi<sup>a</sup>, Jianming Xu<sup>a</sup>, Liuyun Chen<sup>a</sup>, Tongming Su<sup>a</sup>, Xinling Xie<sup>a</sup>, Xuan Luo<sup>a</sup>, Zuzeng

Qin<sup>a,\*</sup>, Hongbing Ji<sup>a,b</sup>

- a. Guangxi Key Laboratory of Petrochemical Resource Processing and Process Intensification Technology, School of Chemistry and Chemical Engineering, Guangxi University, Nanning 530004, PR China
- b. Institute of Green Petroleum Processing and Light Hydrocarbon Conversion, College of Chemical Engineering, Zhejiang University of Technology, Hangzhou 310014, PR China

---

\* Corresponding author. E-mail: [qinzuzeng@gxu.edu.cn](mailto:qinzuzeng@gxu.edu.cn).

## Test methods of in-situ DRIFTS

For the pretreatment of samples, all catalysts are pretreated at 300 °C with argon before testing to clean the adsorbed pollutant. After that, the background is recorded under 30 mL·min<sup>-1</sup> argon flowing and 50 °C. And the dilute CAL solution was bubbled and blown into the in-situ cell by 30 mL·min<sup>-1</sup> argon flowing until adsorption saturation, then record the adsorbed CAL spectra after remove the physical adsorbed CAL. The spectra of CAL hydrogenation need to record the background at 120 °C and treat the sample adsorbed CAL under 120 °C and 30 mL·min<sup>-1</sup> H<sub>2</sub>, and the spectra are recorded per 10 min.

## Computational method

The spin-polarized Density function theory (DFT) calculation was used to reveal the surface structure of catalysts and the potential adsorption configuration of CAL over the catalysts. All calculations were performed by Vienna Ab-initio Simulation Package (VASP) with the projector augmented wave (PAW) method<sup>1, 2</sup>, in a combination with the DFT-D3 correction<sup>3</sup>. The cell structure of Ti<sub>3</sub>C<sub>2</sub>O<sub>2</sub> was referring to the previous research, and the Ti<sub>3</sub>C<sub>2</sub>O<sub>2</sub>(001) and TCOs(001) was modelled as a 4×4 supercell with a 30 Å thickness of the vacuum. Further, based on the potential positions for anchoring Co atoms over the Ti<sub>3</sub>C<sub>2</sub>O<sub>2</sub>(001) (Scheme 1), a several structures of Co/Ti<sub>3</sub>C<sub>2</sub>O<sub>2</sub> and Co/TCOs were built. The energy cutoff was 500 eV after structural optimization, and a Gamma k-point was set as 3×3×1 grid to sample for Brillouin zone. The Gaussian smearing method was employed with a width of 0.1 eV. The geometry relaxation was terminated when the forces on all the atoms were converged to smaller than 0.05 eV/Å. The adsorption energy ( $E_{\text{ads}}$ ) was defined as equation:  $E_{\text{ads}} = E_{\text{adsorbate+surface}} - E_{\text{adsorbate}} - E_{\text{surface}}$ . The transfer amount of charges were obtained by the Bader

approach<sup>4</sup>. Transition state searches were performed at the same theoretical level with the CI-NEB method. All the models are the most stable structure obtained through optimization and screening.

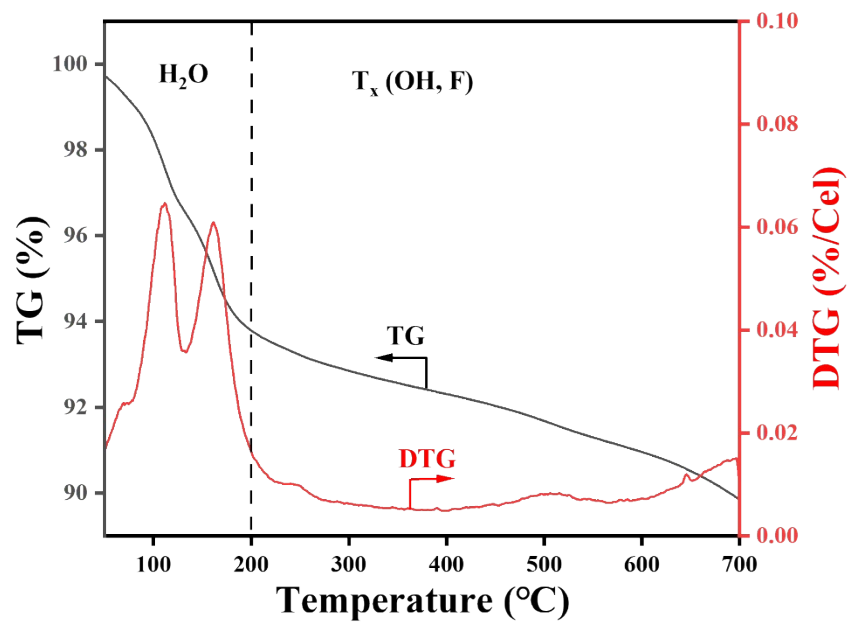

Fig. S1 The TG and DTG curves of  $Ti_3C_2T_x$  under argon atmosphere.

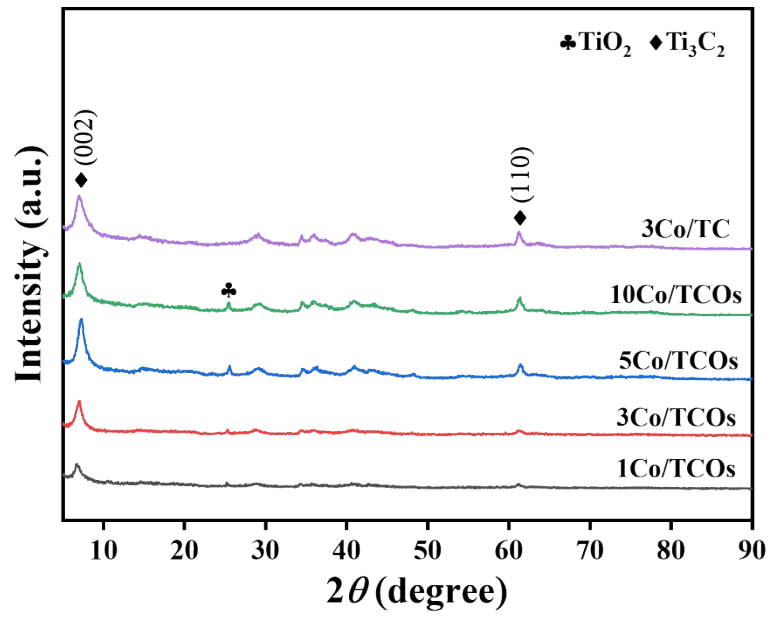

Fig. S2 XRD patterns of  $x\text{Co}/\text{TCOs}$  samples.

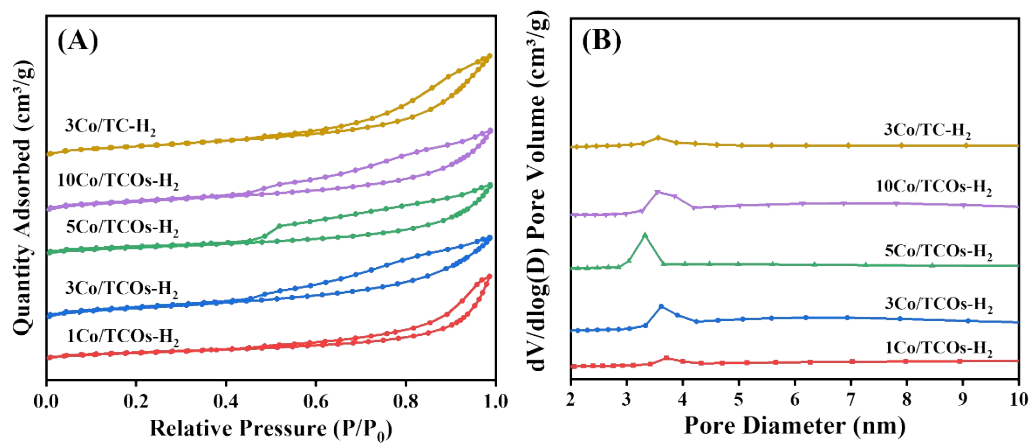

Fig. S3 (A) N<sub>2</sub> adsorption-desorption isotherms and (B) pore size distribution of catalysts.

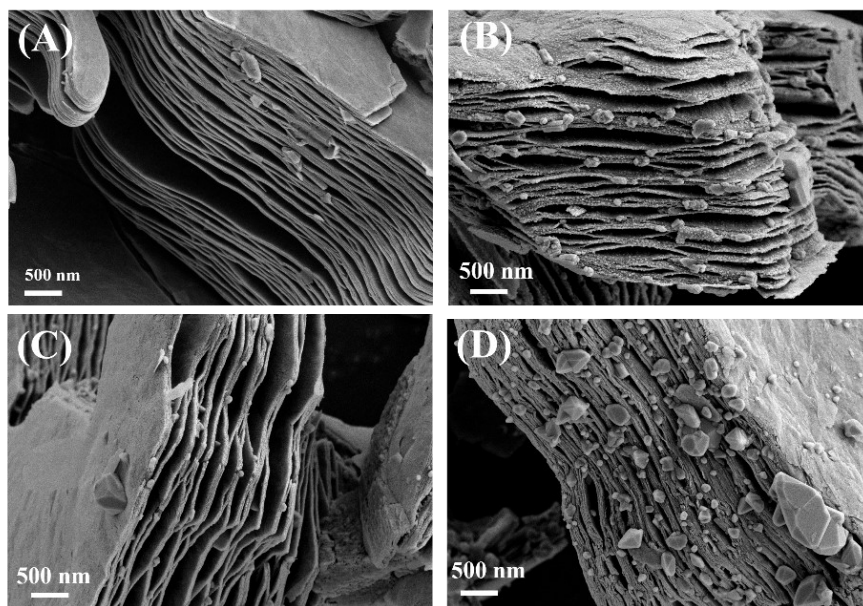

Fig. S4 SEM images of (A) TC, (B) TCOs, (C) TCOs-H<sub>2</sub>, and (D) spent 3Co/TCOs-H<sub>2</sub>.

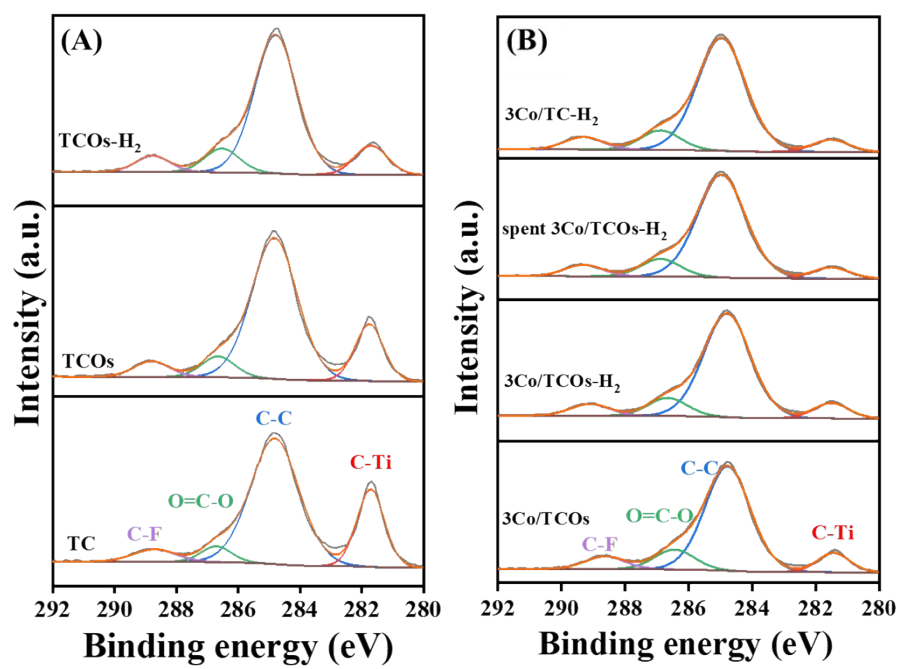

Fig. S5 C 1s XPS spectra of various (A) supports and (B) catalysts.

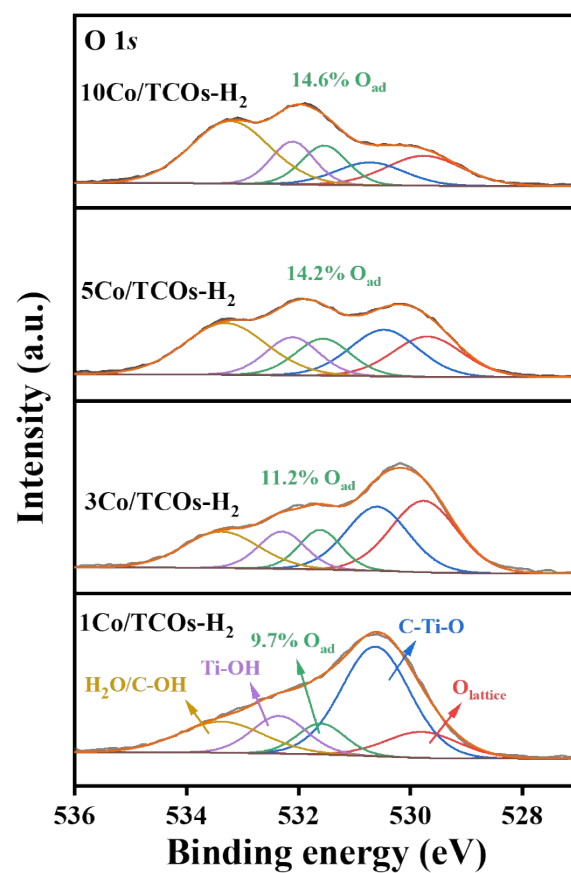

Fig. S6 O 1s XPS spectra of  $\gamma$ Co/TCOs-H<sub>2</sub> catalysts ( $\gamma=1, 3, 5, 10$ ).

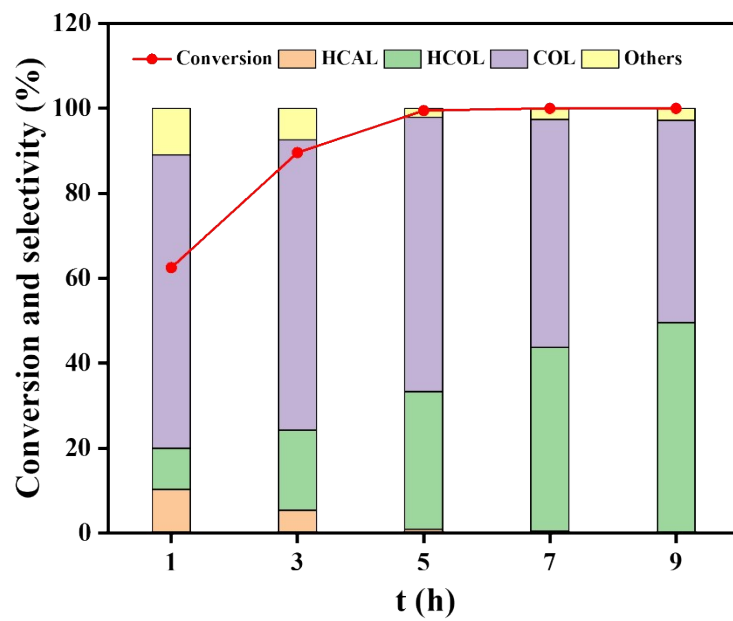

Fig. S7 Hydrogenation activities of 5Co/TCOs-H<sub>2</sub> catalyst.

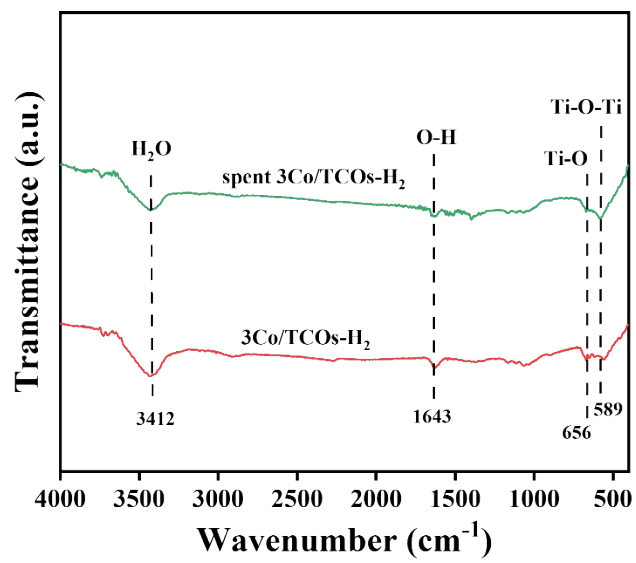

Fig. S8 The FT-IR spectra of 3Co/TCOs-H<sub>2</sub> and spent 3Co/TCOs-H<sub>2</sub> catalyst.

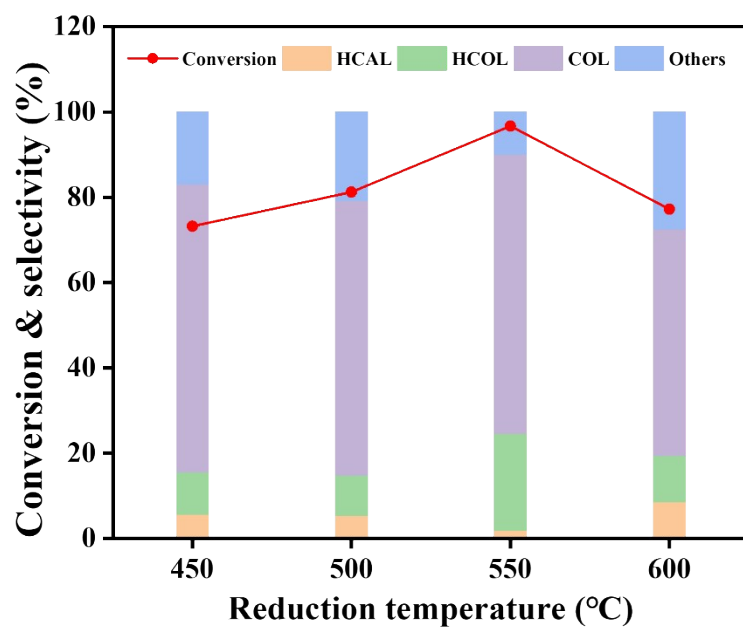

Fig. S9 Hydrogenation activities of 3Co/TCOs-H<sub>2</sub> catalyst at different reduction temperatures.

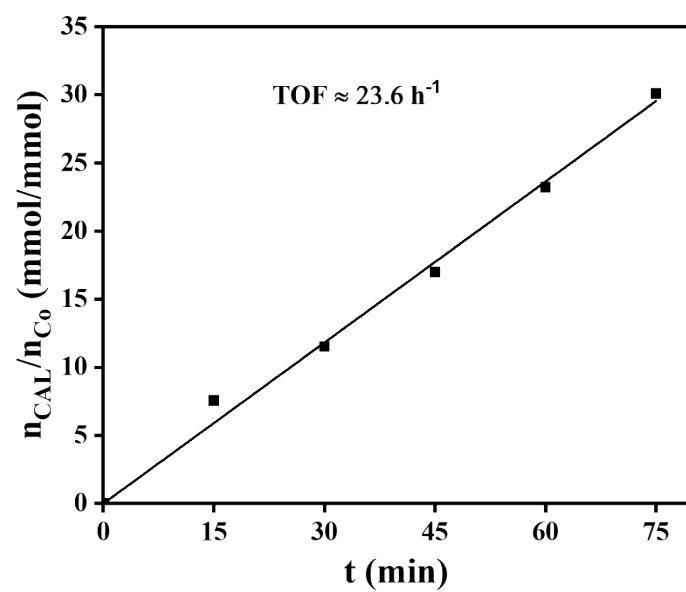

Fig. S10 The selective hydrogenation of CAL over 3Co/TCOs-H<sub>2</sub> catalyst.

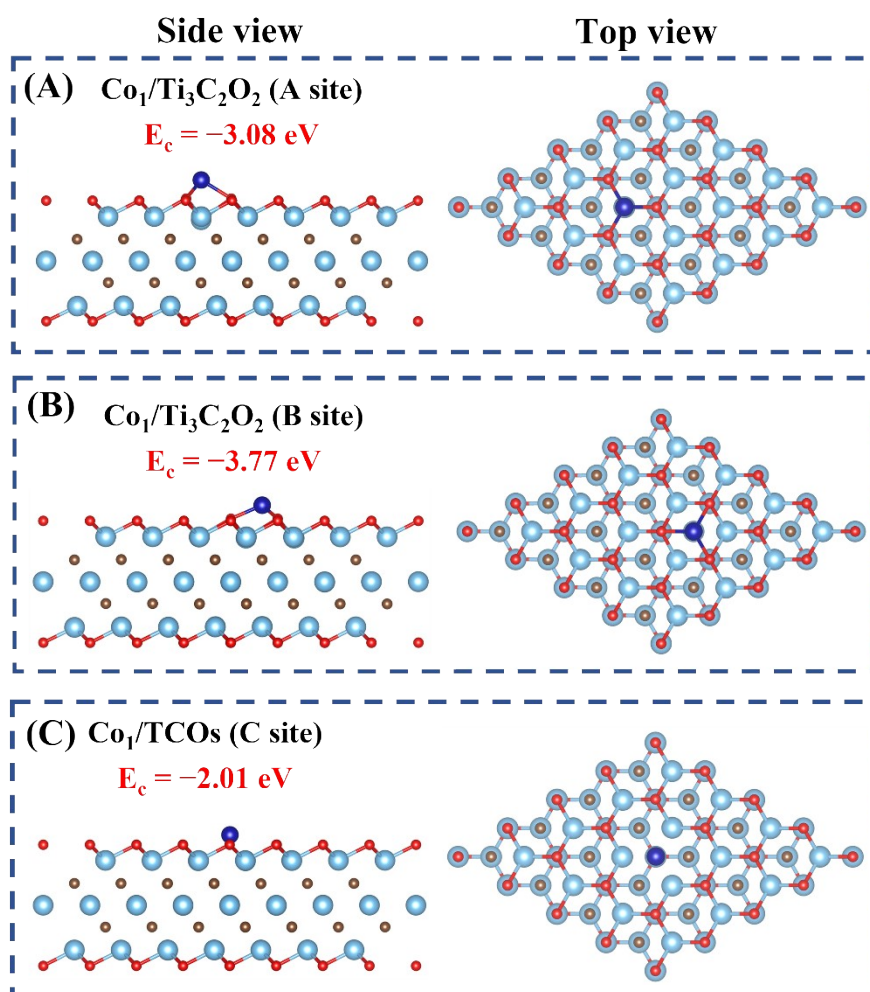

Fig. S11 The side and top view of optimized structures and corresponding combination energy ( $E_c$ ) of single Co atom anchored on (A) A site, (B) B site, and (C) C site.

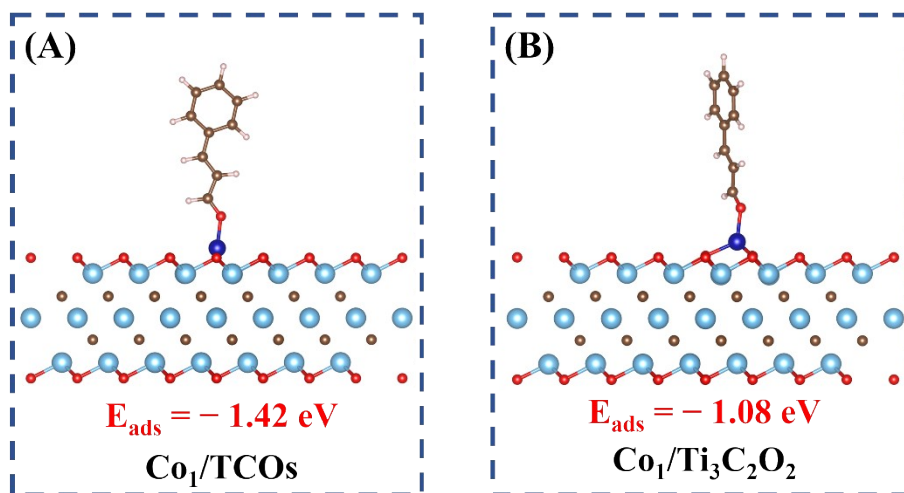

Fig. S12 The optimized configurations and adsorption energy of CAL over (A)  $\text{Co}_1/\text{TCOs}$  and

(B)  $\text{Co}_1/\text{Ti}_3\text{C}_2\text{O}_2$ .

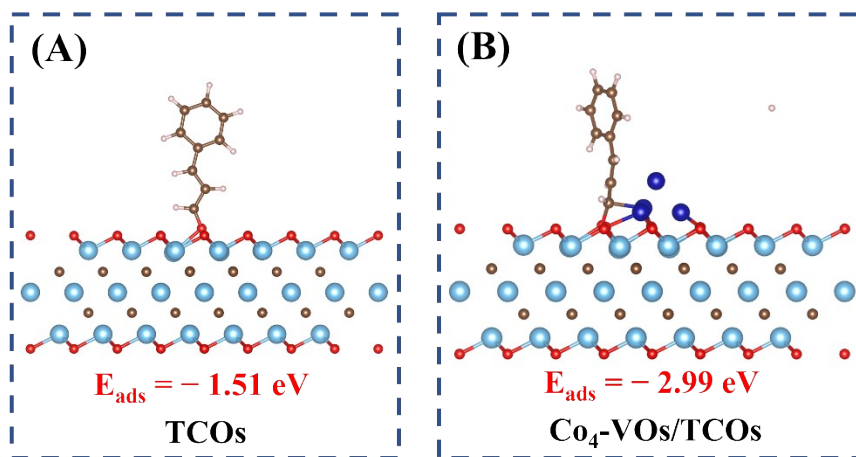

Fig. S13 The optimized configurations and adsorption energy of CAL over (A) TCOs and (B)

Co<sub>4</sub>-VOs/TCOs.

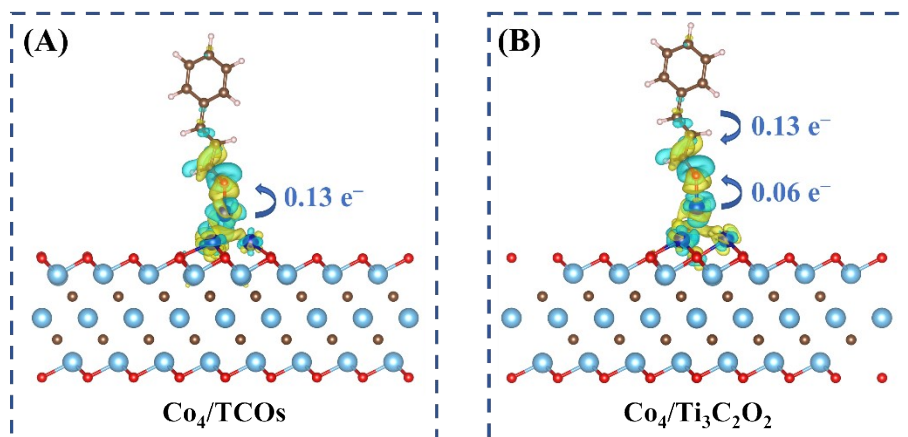

Fig. S14 Differential charge density of CAL adsorbed on (A)  $\text{Co}_4/\text{TCOs}$  and (B)  $\text{Co}_4/\text{Ti}_3\text{C}_2\text{O}_2$ .

Table S1 The Co amount of Co/TCOs-H<sub>2</sub> catalysts calculated by ICP results.

| Catalyst                      | Co content ( wt% ) |
|-------------------------------|--------------------|
| 1Co/TCOs-H <sub>2</sub>       | 0.92               |
| 3Co/TCOs-H <sub>2</sub>       | 2.84               |
| 5Co/TCOs-H <sub>2</sub>       | 4.15               |
| 10Co/TCOs-H <sub>2</sub>      | 8.18               |
| spent 3Co/TCOs-H <sub>2</sub> | 2.82               |

Table S2 The structural properties of  $\gamma$ Co/TCOs-H<sub>2</sub> catalysts calculated by BET methods.

| Catalyst                 | $S_{BET}$ (m <sup>2</sup> ·g <sup>-1</sup> ) | $V_p$ (cm <sup>3</sup> ·g <sup>-1</sup> ) | $D_{pore}$ (nm) |
|--------------------------|----------------------------------------------|-------------------------------------------|-----------------|
| 1Co/TCOs-H <sub>2</sub>  | 39.57                                        | 0.08                                      | 6.59            |
| 3Co/TCOs-H <sub>2</sub>  | 67.51                                        | 0.12                                      | 6.01            |
| 5Co/TCOs-H <sub>2</sub>  | 63.67                                        | 0.09                                      | 4.91            |
| 10Co/TCOs-H <sub>2</sub> | 62.34                                        | 0.11                                      | 5.57            |
| 3Co/TC-H <sub>2</sub>    | 64.20                                        | 0.13                                      | 7.12            |

Table S3 H<sub>2</sub> chemisorption and metal dispersion degree of several samples.

| Samples                       | H <sub>2</sub> uptake ( $\mu\text{mol}\cdot\text{g}^{-1}$ ) | Co dispersion (%) |
|-------------------------------|-------------------------------------------------------------|-------------------|
| 3Co/TC-H <sub>2</sub>         | 3.56                                                        | 0.75              |
| 3Co/TCOs-H <sub>2</sub>       | 22.86                                                       | 4.49              |
| Spent 3Co/TCOs-H <sub>2</sub> | 5.92                                                        | 1.24              |

Table S4 Constitution of surface O species and F/O calculated from XPS results.

| Sample                   | Proportion of O species (%) |        |                 |       |                       |      |
|--------------------------|-----------------------------|--------|-----------------|-------|-----------------------|------|
|                          | O <sub>lattice</sub>        | C-Ti-O | O <sub>ad</sub> | Ti-OH | C-OH/H <sub>2</sub> O | F/O  |
| TC                       | 20.4                        | 17.1   | N/A             | 41.7  | 20.8                  | 1.08 |
| TCOs                     | 35.3                        | 26.1   | 11.7            | 10.6  | 16.3                  | 0.60 |
| TCOs-H <sub>2</sub>      | 31.0                        | 26.3   | 13.7            | 8.4   | 14.9                  | 0.96 |
| 3Co/TCOs                 | 49.7                        | 15.3   | 13.8            | 9.4   | 11.8                  | 0.13 |
| 3Co/TCOs-H <sub>2</sub>  | 31.8                        | 27.1   | 11.2            | 11.8  | 18.1                  | 0.18 |
| 3Co/TC-H <sub>2</sub>    | 32.3                        | 40.3   | 8.4             | 10.9  | 8.1                   | 0.18 |
| 1Co/TCOs-H <sub>2</sub>  | 12.1                        | 48.3   | 9.7             | 13.0  | 16.9                  | 0.18 |
| 5Co/TCOs-H <sub>2</sub>  | 19.8                        | 22.4   | 14.2            | 14.2  | 29.5                  | 0.16 |
| 10Co/TCOs-H <sub>2</sub> | 18.2                        | 12.6   | 14.6            | 15.0  | 39.5                  | 0.15 |

Table S5 Constitution of Co species calculated by XPS results.

| Sample                        | Proportion of Co species (%) |                  |                 |
|-------------------------------|------------------------------|------------------|-----------------|
|                               | Co <sup>3+</sup>             | Co <sup>2+</sup> | Co <sup>0</sup> |
| 3Co/TCOs                      | 61.7                         | 38.3             | -               |
| 3Co/TCOs-H <sub>2</sub>       | 44.8                         | 40.8             | 14.3            |
| Spent 3Co/TCOs-H <sub>2</sub> | 50.5                         | 30.8             | 18.7            |
| 3Co/TC-H <sub>2</sub>         | 25.8                         | 54.9             | 19.2            |

Table S6 Hydrogenation properties of reactivated 3Co/TCOs-H<sub>2</sub> catalyst.

| Recycle             | Conversion (%) | Selectivity (%) |      |      |        |
|---------------------|----------------|-----------------|------|------|--------|
|                     |                | HCAL            | HCOL | COL  | Others |
| Fresh catalyst      | 96.9           | 2.2             | 20.8 | 69.5 | 7.5    |
|                     | 67.9           | 10.3            | 7.1  | 72.1 | 10.5   |
| Reactivated cycle 1 | 95.4           | 3.9             | 19.2 | 68.3 | 8.6    |
|                     | 78.8           | 8.5             | 7.8  | 71.2 | 12.5   |
| Reactivated cycle 2 | 92.8           | 4.0             | 18.6 | 70.6 | 6.8    |
|                     | 62.5           | 10.3            | 9.7  | 69.1 | 10.9   |
| Reactivated cycle 3 | 91.6           | 5.4             | 18.9 | 68.3 | 7.4    |

Reaction conditions: 1.0 g of CAL; 30 mL of isopropanol; 0.2 g of catalyst; reaction temperature of 120 °C; H<sub>2</sub> pressure of 1.0 MPa; and reaction time of 5 h.

Table S7 Hydrogenation properties of 3Co/TCOs-H<sub>2</sub> catalyst with different solvents.

| Solvent      | Conversion (%) | Selectivity (%) |      |      |        |
|--------------|----------------|-----------------|------|------|--------|
|              |                | HCAL            | HCOL | COL  | Others |
| Water        | 32.8           | 22.9            | 10.0 | 67.1 | 0.0    |
| Methanol     | 97.3           | 0.7             | 12.6 | 25.8 | 60.9   |
| Ethanol      | 90.0           | 1.5             | 5.7  | 23.9 | 68.9   |
| Isopropanol  | 96.7           | 1.9             | 22.7 | 65.5 | 9.9    |
| cyclohexanol | 66.1           | 9.0             | 13.8 | 64.7 | 12.5   |

Reaction conditions: 1.0 g of CAL; 30 mL of isopropanol; 0.2 g of catalyst; reaction temperature of 120 °C; H<sub>2</sub> pressure of 1.0 MPa; and reaction time of 5 h.

Table S8 The bader charge quantity of Co atoms and unsaturated bond of CAL for several samples.

| Catalysts                                                           | Charge quantity |      |      |           |       |      |
|---------------------------------------------------------------------|-----------------|------|------|-----------|-------|------|
|                                                                     | Co1             | Co2  | Co3  | Co4 (top) | C=O   | C=C  |
| Co <sub>4</sub> /Ti <sub>3</sub> C <sub>2</sub> O <sub>2</sub>      | 8.27            | 8.33 | 8.28 | 9.05      | –     | –    |
| Co <sub>4</sub> /Ti <sub>3</sub> C <sub>2</sub> O <sub>2</sub> -CAL | 8.28            | 8.34 | 8.30 | 8.80      | 10.42 | 8.01 |
| Co <sub>4</sub> /TCOs                                               | 8.63            | 8.61 | 8.63 | 8.96      | –     | –    |
| Co <sub>4</sub> /TCOs-CAL                                           | 8.64            | 8.64 | 8.63 | 8.75      | 10.37 | 8.14 |
| CAL                                                                 | –               | –    | –    | –         | 10.23 | 8.14 |

## Reference

1. P. E. Blöchl, *Phys. Rev. B*, 1994, **50**, 17953-17979.
2. J. Hafner, *J. Comput. Chem.*, 2008, **29**, 2044-2078.
3. S. Grimme, J. Antony, S. Ehrlich and H. Krieg, *J. Chem. Phys.*, 2010, **132**, 154104.
4. G. Henkelman, A. Arnaldsson and H. Jónsson, *Computational Materials Science*, 2006, **36**, 354-360.
